# Supplementary material
Source: PubMed Central journal article supplement (PMC4547205)
Supplement: DS_10.1177_0022034515584384.pdf [file DS_10.1177_0022034515584384.pdf]

## CLINICAL INVESTIGATIONS

# Insulin Response Genes in Different Stages of Periodontal Disease

N. Yu<sup>1,2</sup>, S.P. Barros<sup>1,3</sup>, S. Zhang<sup>1</sup>, K.L. Moss<sup>1</sup>, S.T. Phillips<sup>1</sup>, and S. Offenbacher<sup>1,3\*</sup>

Appendix

## Appendix Table.

Complete List of Gene Transcription in Diseased Compared with Healthy Subjects

|         | Gingivitis  |          | Periodontitis |         |
|---------|-------------|----------|---------------|---------|
|         | Fold Change | P Value  | Fold Change   | P Value |
| G6PD    | 14.11       | 0.000088 | 3.34          | 0.33    |
| IFNG    | 13.12       | 0.0010   | 1.94          | 0.22    |
| CEBPA   | 10.39       | 0.00006  | 2.64          | 0.12    |
| DUSP4   | 9.90        | 0.0022   | 2.04          | 0.31    |
| PDX1    | 9.69        | 0.02     | 1.42          | 0.91    |
| SNAP23  | 8.48        | 0.01     | 1.86          | 0.67    |
| PRKCB   | 7.82        | 0.0014   | 1.09          | 0.76    |
| PARP1   | 6.98        | 0.0019   | 3.40          | 0.28    |
| IRS1    | 6.69        | 0.0011   | 2.20          | 0.25    |
| STXBP2  | 6.66        | 0.0029   | 2.25          | 0.56    |
| TRIB3   | 6.39        | 0.0041   | 1.51          | 0.19    |
| IL12B   | 6.38        | 0.038    | 1.20          | 0.66    |
| STX4    | 6.01        | 0.012    | 2.01          | 0.95    |
| CCL5    | 5.06        | 0.93     | 2.67          | 0.51    |
| PIK3CD  | 5.06        | 0.00088  | 1.60          | 0.37    |
| IL6     | 5.02        | 0.14     | 1.98          | 0.65    |
| SREBF1  | 4.95        | 0.0029   | 1.49          | 0.95    |
| PRKAG2  | 4.84        | 0.00038  | 2.09          | 0.12    |
| HNF4A   | 4.66        | 0.74     | 1.72          | 0.90    |
| NSF     | 4.56        | 0.00015  | 1.96          | 0.40    |
| SNAP25  | 4.43        | 0.0017   | 1.76          | 0.18    |
| PIK3C2B | 4.37        | 0.0010   | 1.08          | 0.71    |
| MAPK14  | 3.94        | 0.0019   | 2.05          | 0.33    |

(continued)

DOI: 10.1177/0022034515584384. <sup>1</sup>Center for Oral and Systemic Diseases, University of North Carolina at Chapel Hill, Chapel Hill, NC, USA; <sup>2</sup>Oral Biology Curriculum, School of Dentistry, University of North Carolina at Chapel Hill, Chapel Hill, NC, USA; and <sup>3</sup>Department of Periodontology, School of Dentistry, University of North Carolina at Chapel Hill, Chapel Hill, NC, USA; \*corresponding author, steven\_offenbacher@unc.edu

© International & American Associations for Dental Research

**Appendix Table.**

(continued)

|          | Gingivitis  |           | Periodontitis |         |
|----------|-------------|-----------|---------------|---------|
|          | Fold Change | P Value   | Fold Change   | P Value |
| CCR2     | 3.83        | 0.10      | 1.18          | 0.92    |
| PPARGC1A | 3.80        | 0.00022   | 1.16          | 0.31    |
| HNF1B    | 3.76        | 0.0015    | 1.24          | 0.41    |
| IRS2     | 3.71        | 0.0074    | 1.37          | 0.89    |
| ACE      | 3.67        | 0.15      | 1.91          | 0.67    |
| RPLP0    | 3.56        | 0.00017   | 1.53          | 0.56    |
| PPARG    | 3.55        | 0.024     | 1.56          | 0.95    |
| SELL     | 3.55        | 0.0031    | 1.43          | 0.31    |
| HMOX1    | 3.46        | 0.00045   | 1.46          | 0.32    |
| ACLY     | 3.32        | 0.011     | 1.76          | 0.52    |
| HPRT1    | 2.99        | 0.06      | 1.58          | 0.23    |
| NOS3     | 2.94        | 0.19      | 2.01          | 0.42    |
| NRF1     | 2.87        | 0.01      | 1.28          | 0.46    |
| PTPN1    | 2.72        | 0.0020    | 1.23          | 0.40    |
| VEGFA    | 2.70        | 0.17      | 2.02          | 0.51    |
| IL4R     | 2.69        | 0.99      | 5.68          | 0.90    |
| FOXC2    | 2.67        | 0.12      | 1.43          | 0.67    |
| VAMP3    | 2.62        | 0.0000050 | 1.27          | 0.26    |
| NKX2-1   | 2.34        | 0.88      | 1.05          | 0.99    |
| ME1      | 2.33        | 0.01      | 0.96          | 0.71    |
| ICAM1    | 2.15        | 0.32      | 0.90          | 0.47    |
| FOXP3    | 2.10        | 0.83      | 1.40          | 0.91    |
| CEACAM1  | 1.85        | 0.21      | 0.91          | 0.48    |
| INS      | 1.65        | 0.91      | 0.91          | 0.70    |
| GSK3B    | 1.65        | 0.0019    | 0.89          | 0.47    |
| PPARGC1B | 1.61        | 0.59      | 1.00          | 0.61    |
| SLC2A4   | 1.54        | 0.48      | 0.73          | 0.71    |
| ACTB     | 1.43        | 0.43      | 1.64          | 0.24    |
| FBP1     | 1.41        | 0.90      | 2.02          | 0.36    |
| IGFBP5   | 1.38        | 0.66      | 1.73          | 0.54    |
| MAPK8    | 1.31        | 0.18      | 0.97          | 0.86    |
| CTLA4    | 1.31        | 0.57      | 1.26          | 0.82    |
| TNFRSF1A | 1.29        | 0.99      | 0.88          | 0.57    |
| PRKAA1   | 1.27        | 0.66      | 2.27          | 0.69    |
| VAPA     | 1.26        | 0.08      | 0.93          | 0.40    |
| PPARA    | 1.25        | 0.61      | 1.04          | 0.91    |
| RAB4A    | 1.21        | 0.65      | 1.81          | 0.80    |
| AGT      | 1.05        | 0.16      | 0.65          | 0.21    |
| INPPL1   | 0.96        | 0.85      | 0.85          | 0.59    |
| INSR     | 0.87        | 0.85      | 1.08          | 0.64    |
| IKKB     | 0.87        | 0.42      | 1.28          | 0.52    |
| FOXG1    | 0.87        | 0.29      | 0.47          | 0.16    |

(continued)

**Appendix Table.**

(continued)

|        | Gingivitis  |         | Periodontitis |         |
|--------|-------------|---------|---------------|---------|
|        | Fold Change | P Value | Fold Change   | P Value |
| ENPP1  | 0.78        | 0.91    | 1.05          | 0.87    |
| NFKB1  | 0.68        | 0.09    | 0.81          | 0.34    |
| TNF    | 0.65        | 0.16    | 0.87          | 0.83    |
| IL10   | 0.62        | 0.75    | 1.17          | 0.90    |
| PIK3R1 | 0.60        | 0.47    | 0.59          | 0.35    |
| B2M    | 0.59        | 0.29    | 0.73          | 0.58    |
| IDE    | 0.50        | 0.39    | 1.75          | 0.73    |
| AKT2   | 0.45        | 0.50    | 0.97          | 0.89    |
| CD28   | 0.42        | 0.20    | 0.54          | 0.22    |
| STXBP1 | 0.28        | 0.77    | 0.77          | 0.98    |
| TGFB1  | 0.23        | 0.68    | 0.66          | 0.99    |

P values are raw values computed by Student's *t* test.
